# Supplementary material for: Atm reactivation reverses ataxia telangiectasia phenotypes in vivo
Source: PubMed Central journal article supplement (PMC5833483; doi:10.1038/s41419-018-0357-8), 2018-02-22
Supplement: 41419_2018_357_MOESM1_ESM.pdf [file 41419_2018_357_MOESM1_ESM.pdf]

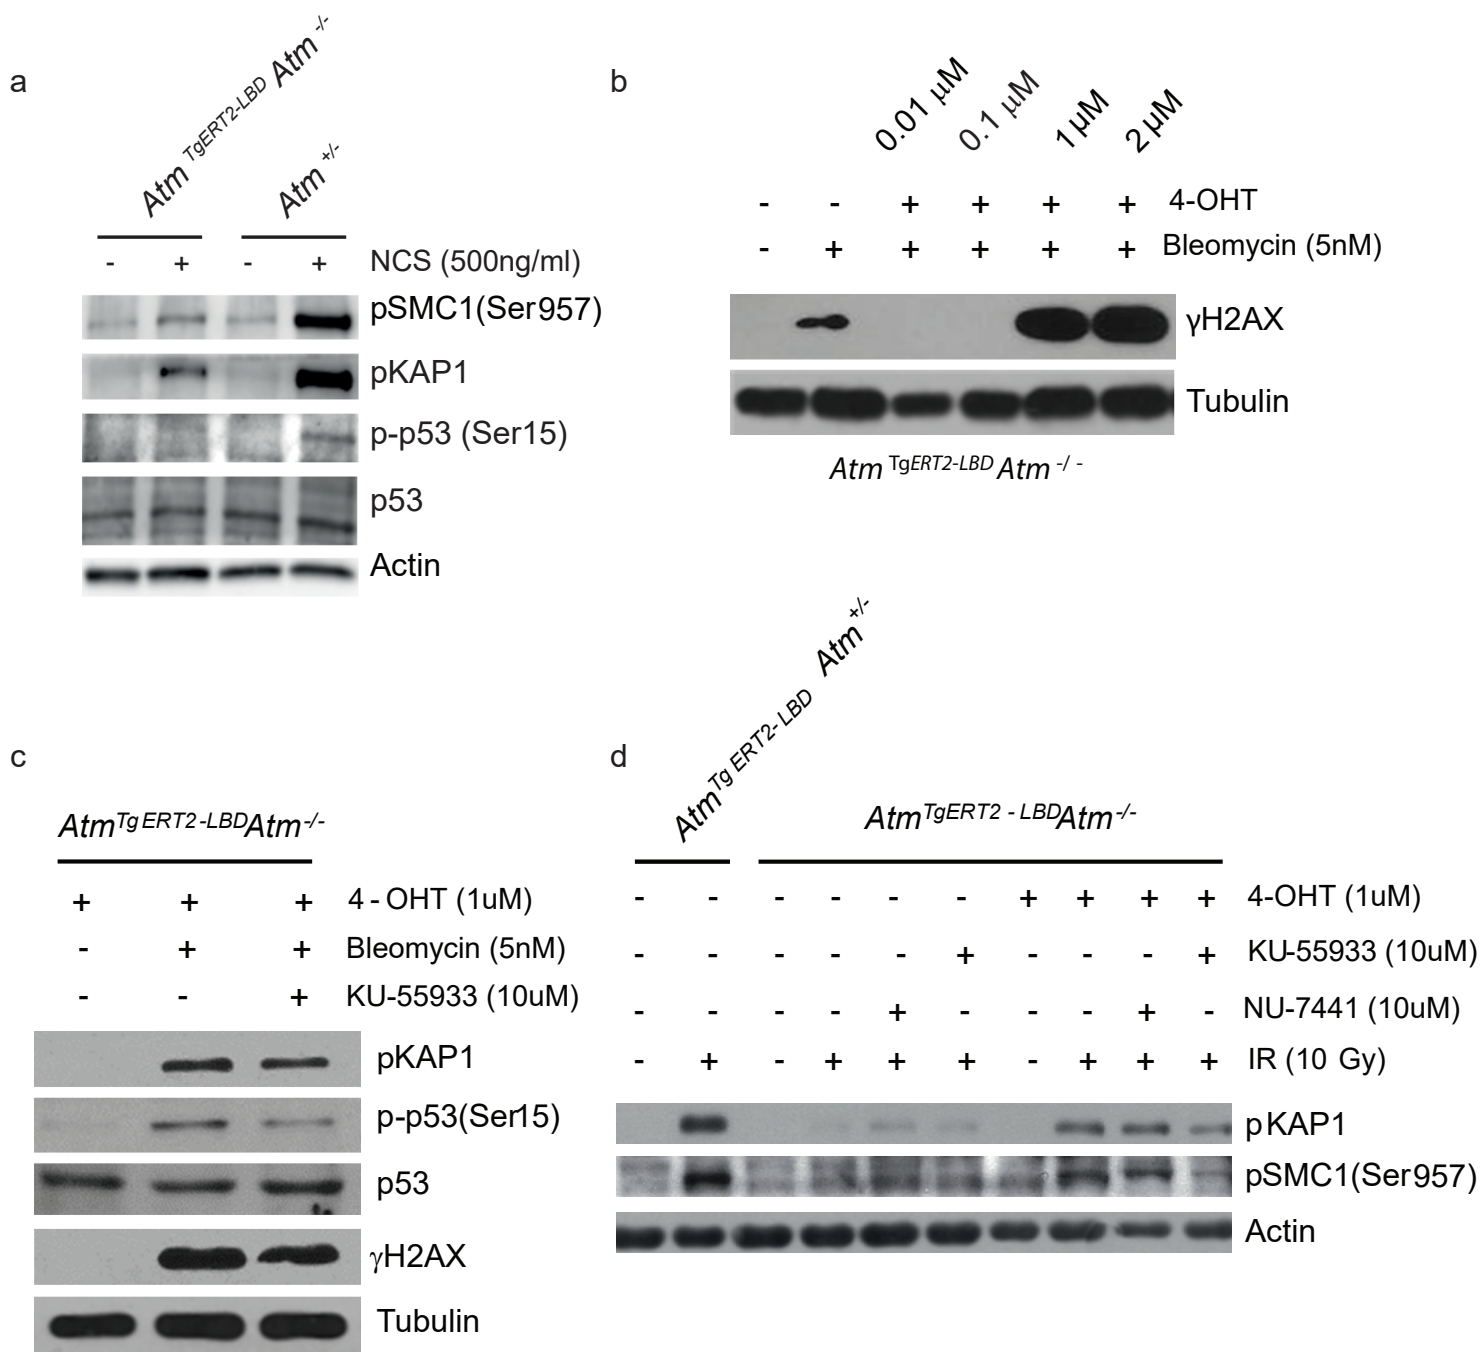

**Figure S1. Induced Atm mediates DNA damage response in *Atm<sup>TgERT2-LBD</sup> Atm<sup>-/-</sup>* cells.**

**a)** Western blot analyses of pSMC1, pKAP1 and p-p53 in *Atm<sup>TgERT2-LBD</sup> Atm<sup>-/-</sup>* and *Atm<sup>+/-</sup>* thymocytes treated with NCS 500ng/ml for 1h. **b)** Western blot analyses of EFs isolated from *Atm<sup>TgERT2-LBD</sup> Atm<sup>-/-</sup>* mice and treated with different doses of 4-OHT and 5nM bleomycin. 1 $\mu$ M 4-OHT is the minimum dose found to induce the maximal DNA damage response as evaluated by H2AX phosphorylation. **c)** Atm-dependent DNA damage response was evaluated by phospho-Kap1, -p53 and -H2AX detection in *Atm<sup>TgERT2-LBD</sup> Atm<sup>-/-</sup>* EFs after 1 $\mu$ M 4-OHT and 5nM bleomycin treatment in the presence or absence of the Atm inhibitor, KU55933. **d)** MEFs from *Atm<sup>TgERT2-LBD</sup> Atm<sup>-/-</sup>* embryos in which Atm was reactivated with 1 $\mu$ M 4-OHT and from *Atm<sup>TgERT2-LBD</sup> Atm<sup>+/-</sup>* embryos were treated or not with 10Gy IR. Extracts were prepared 1h after-irradiation and revealed for pSMC1 and pKAP1 antibodies. MEFs were pre-incubated for 1h with Atm (KU55933) and DNA-PK (NU7026) inhibitors.

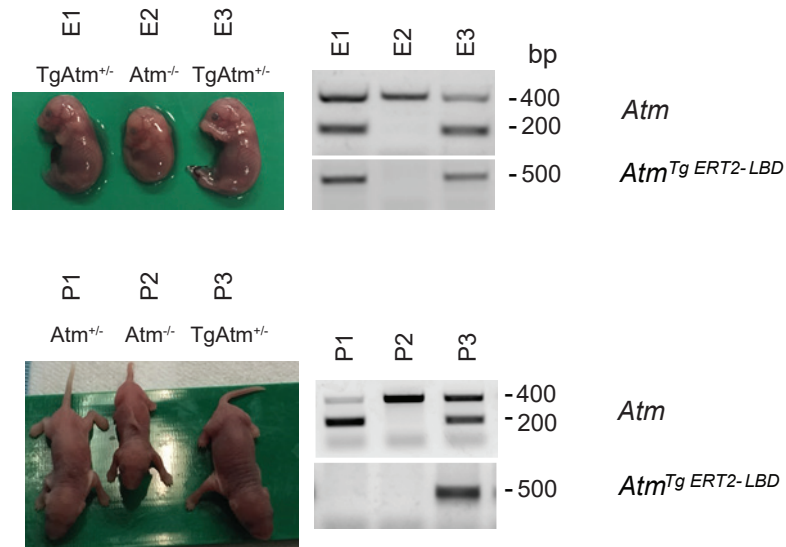

**Figure S2. *Atm* reactivation restores fertility in *Atm*<sup>TgERT2-LBD</sup>*Atm*<sup>-/-</sup> mice.**

Picture of embryos (E17.5 days post coitum; upper panel) and pups (P1-2 days post-partum, lower panel) born from *Atm*<sup>TgERT2-LBD</sup>*Atm*<sup>-/-</sup> males injected with tamoxifen crossed with CD1 and *Atm*<sup>+/-</sup> females. On the right side representative PCRs for genotyping are shown: *Atm* wild-type allele (400bp), *Atm* knockout allele (200bp) and transgene allele (500bp)

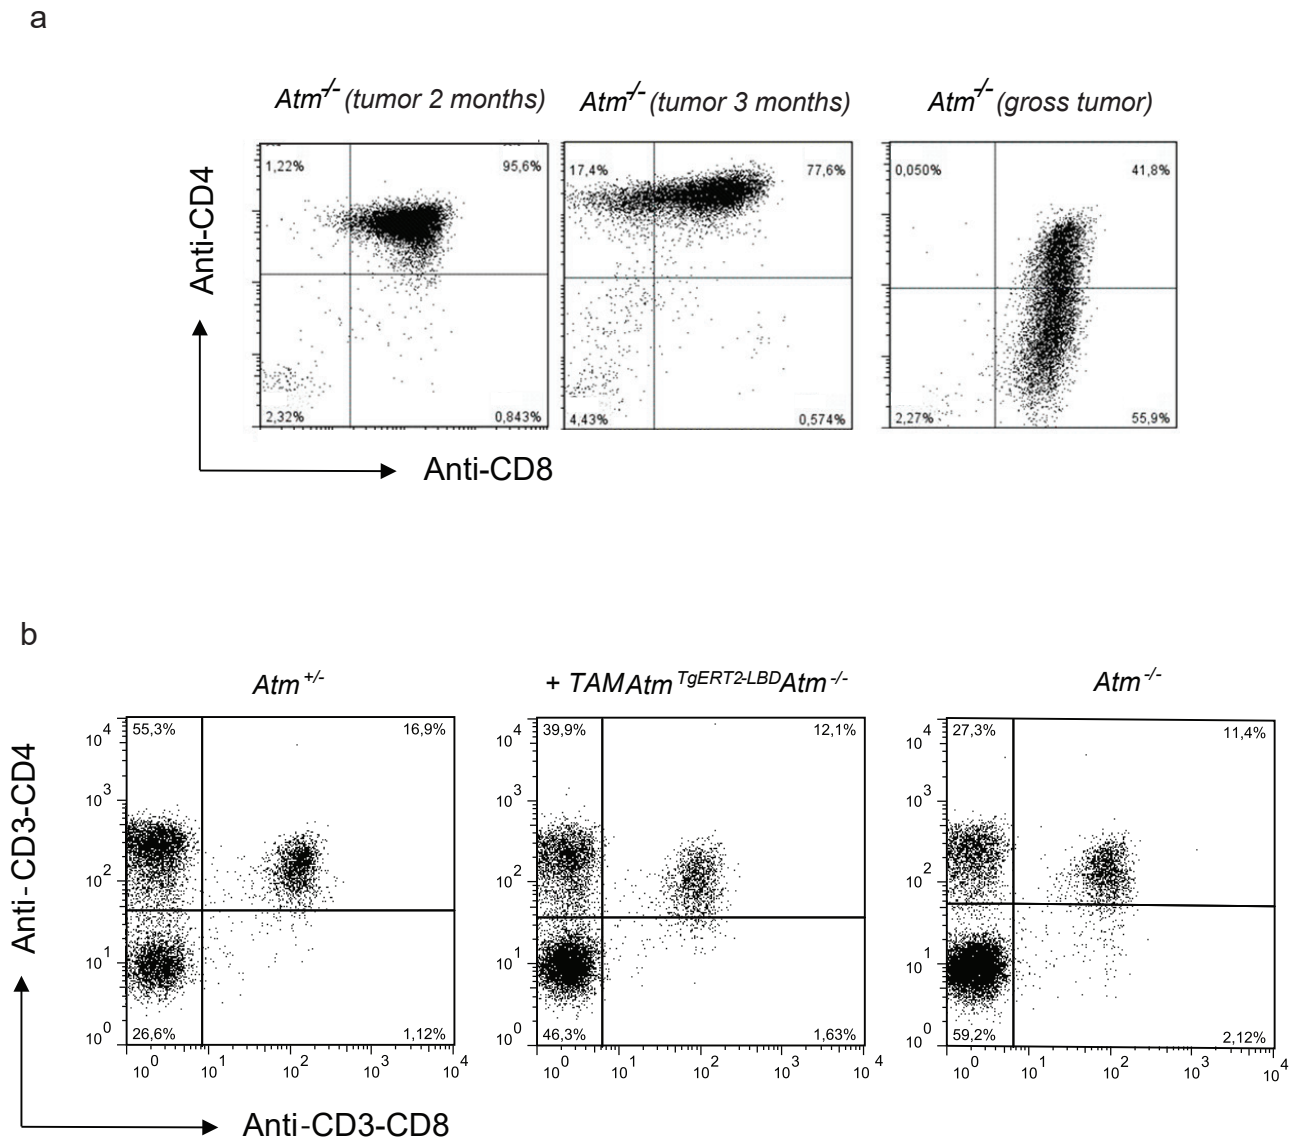

**Figure S3. T cell maturation is achieved and maintained in *Atm*<sup>TgERT2-LBD</sup>*Atm*<sup>-/-</sup> mice after tamoxifen treatment.**

**a)** Flow cytometry analysis of *Atm*<sup>-/-</sup> thymocytes collected at different ages and stained for CD4 and CD8 markers. Different stage of thymoma are shown. **b)** Flow cytometry analysis on peripheral blood cells collected from 9 months *Atm*<sup>TgERT2-LBD</sup>*Atm*<sup>-/-</sup> and *Atm*<sup>+/-</sup> old mice after tamoxifen treatment. For *Atm*<sup>-/-</sup> mice, blood cells were collected at 2 months of age. Representative CD3-CD4 and CD3-CD8 expression patterns are shown. Data were obtained from independent experiments performed on n=3 mice of each genotype.

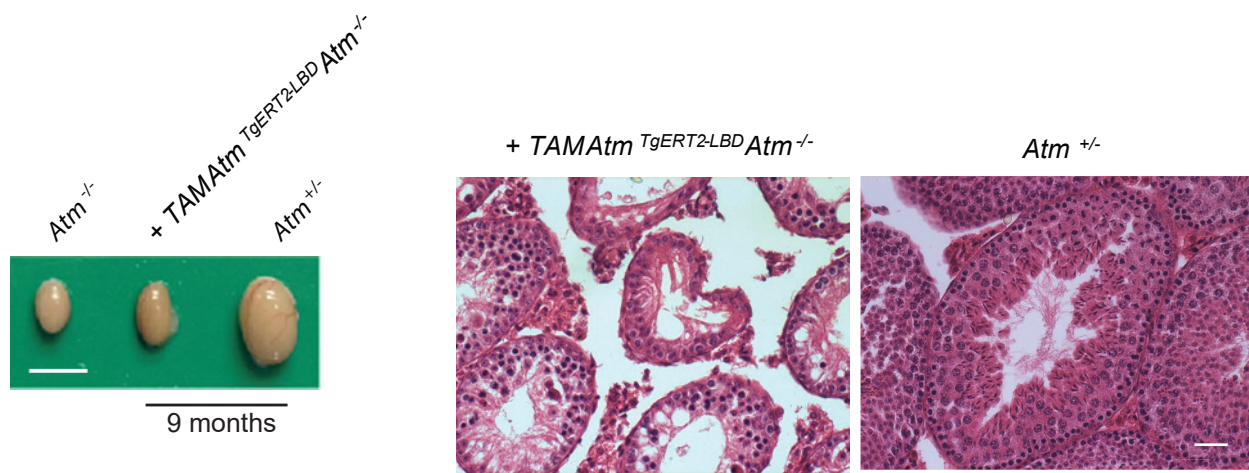

**Figure S4. Spermatogenesis is reversible in tamoxifen-treated  $Atm^{TgERT2-LBD}Atm^{-/-}$  mice .**

Testes picture and relative H&E section staining of  $Atm^{+/-}$  and  $Atm^{TgERT2-LBD}Atm^{-/-}$  males 9 months after tamoxifen treatment.  $Atm^{-/-}$  testis is shown for comparison. Scale bar=50  $\mu$ m.
